# Supplementary material
Source: publisher figshare collection journal article supplement (https://sage.figshare.com/ndownloader/files/12691766)
Supplement: Supplementary file 1 [file 12691766]

## Sheet: lesion & normal
Case	Description		d-spacing	Av. d-spacing	OI	Av. OI	Fibril Diameter [nm]	Average Diameter		Case	Description		d-spacing	Av. d-spacing	OI	Av. OI	Fibril Diameter [nm]	Average Diameter
2	11keV, Lesion A, triton X	Lesion 1A	63.02	63.0589	0.516	0.40695	48.968	49.6196		2	11keV, Normal A, triton X	Normal 1A	65.02	65.0278	0.303	0.277283	38.303	37.7443
	11keV, Lesion A, triton X		63.07		0.4106		49.282				11keV, Normal A, triton X		65.12		0.2976		37.617
	11keV, Lesion A, triton X		63.02		0.3797		51.255				11keV, Normal A, triton X		64.98		0.2667		37.59
	11keV, Lesion A, triton X		63.01		0.4621		49.325				11keV, Normal A, triton X		65.1		0.2491		37.66
	11keV, Lesion A, triton X		63.14		0.3818		48.755				11keV, Normal A, triton X		65.1		0.2688		35.09
	11keV, Lesion A, triton X		63.04		0.2997		50.55				11keV, Normal A, triton X		65.05		0.2867		37.59
	11keV, Lesion A, triton X		63.2		0.3892		52.282				11keV, Normal A, triton X		64.87		0.2762		39.02
	11keV, Lesion A, triton X		63.02		0.3641		47.904				11keV, Normal A, triton X		65.09		0.2511		39.239
	11keV, Lesion A, triton X		63.01		0.3301		48.255				11keV, Normal A, triton X		64.92		0.3171		37.59
2	11keV, Lesion B, triton X	Lesion 1B	63.41	63.3822	0.4508	0.414288	50.508	51.0031		2	11keV, Normal B, triton X	Normal 1B	64.81	65.0033	0.2378	0.2783	36.843	36.5603
	11keV, Lesion B, triton X		63.55		0.3899		50.748				11keV, Normal B, triton X		64.79		0.2769		37.083
	11keV, Lesion B, triton X		63.32		0.4675		46.574				11keV, Normal B, triton X		65.4		0.2545		32.909
	11keV, Lesion B, triton X		63.31		0.3722		50.906				11keV, Normal B, triton X		64.94		0.2592		37.241
	11keV, Lesion B, triton X		63.41		0.7574		53.486				11keV, Normal B, triton X		65.16		0.2844		36.821
	11keV, Lesion B, triton X		63.42		0.4206		50.754				11keV, Normal B, triton X		65.09		0.2976		37.089
	11keV, Lesion B, triton X		63.29		0.5234		54.019				11keV, Normal B, triton X		64.99		0.3104		36.354
	11keV, Lesion B, triton X		63.32		0.3332		51.395				11keV, Normal B, triton X		64.86		0.2402		37.73
	11keV, Lesion B, triton X		63.41		0.3567		50.638				11keV, Normal B, triton X		64.99		0.3437		36.973
2	11keV, Lesion C, triton X	Lesion 1C	63.32	63.3378	0.4009	0.434675	50.754	48.4047		2	11keV, Normal A, triton X	Normal 1A	65.25	65.1	0.2879	0.275175	37.089	34.8509
	11keV, Lesion C, triton X		63.49		0.4833		46.754				11keV, Normal A, triton X		65.2		0.2703		33.089
	11keV, Lesion C, triton X		63.32		0.503		50.574				11keV, Normal A, triton X		65.45		0.29		36.909
	11keV, Lesion C, triton X		63.19		0.3209		34.906				11keV, Normal A, triton X		65.34		0.2479		31.241
	11keV, Lesion C, triton X		63.32		0.4104		50.486				11keV, Normal A, triton X		65.17		0.2974		36.821
	11keV, Lesion C, triton X		63.39		0.4111		43.754				11keV, Normal A, triton X		65.27		0.2981		31.09
	11keV, Lesion C, triton X		63.32		0.4887		50.754				11keV, Normal A, triton X		65.13		0.2757		37.089
	11keV, Lesion C, triton X		63.38		0.3934		56.754				11keV, Normal A, triton X		65.25		0.2684		33.089
	11keV, Lesion C, triton X		63.31		0.4761		50.906				11keV, Normal A, triton X		65.34		0.2631		37.241
2	11keV, Lesion A, triton X	Lesion 1A	63.9	63.7778	0.465	0.435163	49.255	48.4503		2	11keV, Normal B, triton X	Normal 1B	64.92	65.0322	0.252	0.279033	35.59	34.7853
	11keV, Lesion A, triton X		63.36		0.4099		48.29				11keV, Normal B, triton X		64.79		0.2969		34.625
	11keV, Lesion A, triton X		63.9		0.4332		48.126				11keV, Normal B, triton X		65.22		0.2402		34.461
	11keV, Lesion A, triton X		63.39		0.4888		49.104				11keV, Normal B, triton X		65.02		0.2758		35.439
	11keV, Lesion A, triton X		63.67		0.4059		47.327				11keV, Normal B, triton X		64.9		0.2929		33.662
	11keV, Lesion A, triton X		63.74		0.4557		48.055				11keV, Normal B, triton X		65.07		0.2927		34.39
	11keV, Lesion A, triton X		64.32		0.423		49.01				11keV, Normal B, triton X		64.99		0.289		35.345
	11keV, Lesion A, triton X		63.83		0.3998		48.421				11keV, Normal B, triton X		65.16		0.2868		34.756
	11keV, Lesion A, triton X		63.89		0.0152		48.465				11keV, Normal B, triton X		65.22		0.285		34.8
2	11keV, Lesion B, triton X	Lesion 1B	63.36	63.4622	0.3998	0.4268	48.627	47.6392		4	11keV, Normal A, triton X	Normal 2A	65.2	65.2122	0.2868	0.290467	32.962	33.1964
	11keV, Lesion B, triton X		63.34		0.4149		47.355				11keV, Normal A, triton X		65.08		0.2419		37.69
	11keV, Lesion B, triton X		62.94		0.4761		49.31				11keV, Normal A, triton X		65.25		0.2631		31.645
	11keV, Lesion B, triton X		63.49		0.4986		46.721				11keV, Normal A, triton X		65.17		0.2856		33.056
	11keV, Lesion B, triton X		63.71		0.3697		48.765				11keV, Normal A, triton X		65.34		0.3567		38.1
	11keV, Lesion B, triton X		63.64		0.468		47.555				11keV, Normal A, triton X		65.1		0.255		31.89
	11keV, Lesion B, triton X		63.54		0.3222		48.59				11keV, Normal A, triton X		64.97		0.3092		30.925
	11keV, Lesion B, triton X		63.6		0.3478		46.426				11keV, Normal A, triton X		65.4		0.2848		30.761
	11keV, Lesion B, triton X		63.54		0.5441		45.404				11keV, Normal A, triton X		65.4		0.3311		31.739
2	11keV, Lesion C, triton X	Lesion 1C	63.9	63.8811	0.4198	0.439333	55.739	50.1512		4	11keV, Normal B, triton X	Normal 2B	65.71	65	0.2568	0.278011	30.98	33.1504
	11keV, Lesion C, triton X		63.71		0.4909		52.467				11keV, Normal B, triton X		65.91		0.2779		31.037
	11keV, Lesion C, triton X		63.39		0.41		51.538				11keV, Normal B, triton X		65.19		0.2921		32.873
	11keV, Lesion C, triton X		64.86		0.4271		47.516				11keV, Normal B, triton X		65.56		0.2641		33.851
	11keV, Lesion C, triton X		63.49		0.4769		47.422				11keV, Normal B, triton X		65.78		0.2639		32.074
	11keV, Lesion C, triton X		63.67		0.4361		52.667				11keV, Normal B, triton X		65.71		0.2931		38.802
	11keV, Lesion C, triton X		64.91		0.4973		51.702				11keV, Normal B, triton X		65.65		0.2843		33.757
	11keV, Lesion C, triton X		63.1		0.4198		45.433				11keV, Normal B, triton X		64.9		0.3068		31.768
	11keV, Lesion C, triton X		63.9		0.3761		46.877				11keV, Normal B, triton X		65.18		0.2631		33.212
4	11keV, Lesion A, triton X	Lesion 2A	63.59	63.5911	0.465	0.447389	51.255	53.2059		7	11keV, Normal A, triton X	Normal 3A	64.77	64.9122	0.2752	0.279322	37.59	36.4298
	11keV, Lesion A, triton X		64.46		0.4099		56.29				11keV, Normal A, triton X		65.64		0.3969		32.625
	11keV, Lesion A, triton X		63.89		0.4332		51.126				11keV, Normal A, triton X		64.73		0.2402		37.461
	11keV, Lesion A, triton X		63.69		0.4188		51.104				11keV, Normal A, triton X		65.66		0.2358		37.439
	11keV, Lesion A, triton X		63.57		0.4059		56.327				11keV, Normal A, triton X		64.86		0.2929		32.662
	11keV, Lesion A, triton X		62.74		0.4557		54.855				11keV, Normal A, triton X		64.74		0.2427		37.19
	11keV, Lesion A, triton X		63.66		0.423		51.01				11keV, Normal A, triton X		65.68		0.2412		37.345
	11keV, Lesion A, triton X		63.83		0.4998		55.421				11keV, Normal A, triton X		64.01		0.2868		37.756
	11keV, Lesion A, triton X		62.89		0.5152		51.465				11keV, Normal A, triton X		64.12		0.3022		37.8
4	11keV, Lesion B, triton X	Lesion 2B	63.46	63.5356	0.5159	0.440811	52.032	45.6718		7	11keV, Normal B, triton X	Normal 3B	64.84	64.7133	0.3029	0.283367	32.367	37.1384
	11keV, Lesion B, triton X		63.64		0.4149		51.067				11keV, Normal B, triton X		64.64		0.3019		38.402
	11keV, Lesion B, triton X		63.55		0.4761		29.903				11keV, Normal B, triton X		64.82		0.2631		30.238
	11keV, Lesion B, triton X		63.42		0.4986		52.881				11keV, Normal B, triton X		64.46		0.2856		39.216
	11keV, Lesion B, triton X		63.51		0.4697		38.104				11keV, Normal B, triton X		64.64		0.2567		39.0239
	11keV, Lesion B, triton X		63.44		0.468		28.832				11keV, Normal B, triton X		64.55		0.255		38.167
	11keV, Lesion B, triton X		63.64		0.3222		52.787				11keV, Normal B, triton X		64.92		0.3092		39.122
	11keV, Lesion B, triton X		63.52		0.3478		52.198				11keV, Normal B, triton X		64.91		0.3348		38.533
	11keV, Lesion B, triton X		63.64		0.4541		53.242				11keV, Normal B, triton X		64.64		0.2411		39.177
4	11keV, Lesion A, triton X	Lesion 2A	63.62	64.2917	0.4544	0.431033	47.554	47.1938		7	11keV, Normal A, triton X	Normal 3A	64.62	64.8517	0.3414	0.318033	33.889	34.3066
	11keV, Lesion A, triton X		64.83		0.51		46.589				11keV, Normal A, triton X		64.2		0.297		33.924
	11keV, Lesion A, triton X		63.72		0.4271		46.425				11keV, Normal A, triton X		64.72		0.2741		33.76
	11keV, Lesion A, triton X		63.72		0.3555		51.403				11keV, Normal A, triton X		64.72		0.3425		33.738
	11keV, Lesion A, triton X		64.3		0.3768		45.626				11keV, Normal A, triton X		64.9		0.3638		36.961
	11keV, Lesion A, triton X		64.87		0.3427		46.354				11keV, Normal A, triton X		64.87		0.3297		32.689
	11keV, Lesion A, triton X		64.81		0.4945		47.309				11keV, Normal A, triton X		65.8		0.2815		33.644
	11keV, Lesion A, triton X		63.9		0.4422		46.72				11keV, Normal A, triton X		64.9		0.3392		37.055
	11keV, Lesion A, triton X		68.2		0.4761		46.764				11keV, Normal A, triton X		64.9		0.2931		33.099
4	11keV, Lesion B, triton X	Lesion 2B	64.84	63.245	0.4042	0.403	44.075	46.4132		7	11keV, Normal B, triton X	Normal 3B	64.62	64.5511	0.235	0.286089	36.41	36.4482
	11keV, Lesion B, triton X		61.79		0.4051		45.11				11keV, Normal B, triton X		64.85		0.3021		37.445
	11keV, Lesion B, triton X		63.79		0.4343		46.146				11keV, Normal B, triton X		64.85		0.2813		32.481
	11keV, Lesion B, triton X		63.57		0.4556		48.924				11keV, Normal B, triton X		64.77		0.3126		36.259
	11keV, Lesion B, triton X		63.57		0.3915		46.147				11keV, Normal B, triton X		64		0.2885		36.482
	11keV, Lesion B, triton X		63.36		0.4133		46.104				11keV, Normal B, triton X		64.97		0.2603		35.439
	11keV, Lesion B, triton X		62.9		0.421		48.327				11keV, Normal B, triton X		64.1		0.308		35.662
	11keV, Lesion B, triton X		63.01		0.287		45.421				11keV, Normal B, triton X		64.03		0.285		39.056
	11keV, Lesion B, triton X		65.11		0.415		47.465				11keV, Normal B, triton X		64.77		0.302		38.8
			Average	63.5563		0.427944		48.7753					Average	64.9404		0.284508		35.4611
			St Dev	0.71299		0.0784665		4.51487					St Dev	0.394631		0.0310552		2.55434
			Quartile 1	63.32		0.391975		46.7922					Quartile 1	64.8125		0.2631		33.0915
			Quartile 3	63.72		0.469275		51.2227					Quartile 3	65.215		0.30095		37.59
			Interquartile range	0.4		0.0773		4.4305					Interquartile range	0.4025		0.03785		4.4985
